# Supplementary material
Source: Springer Nature journal article supplement (https://www.springermedizin.de/resource/supplementary/12939_2011_261_MOESM2_ESM.pdf/9550722)

**Determinants of mental health**

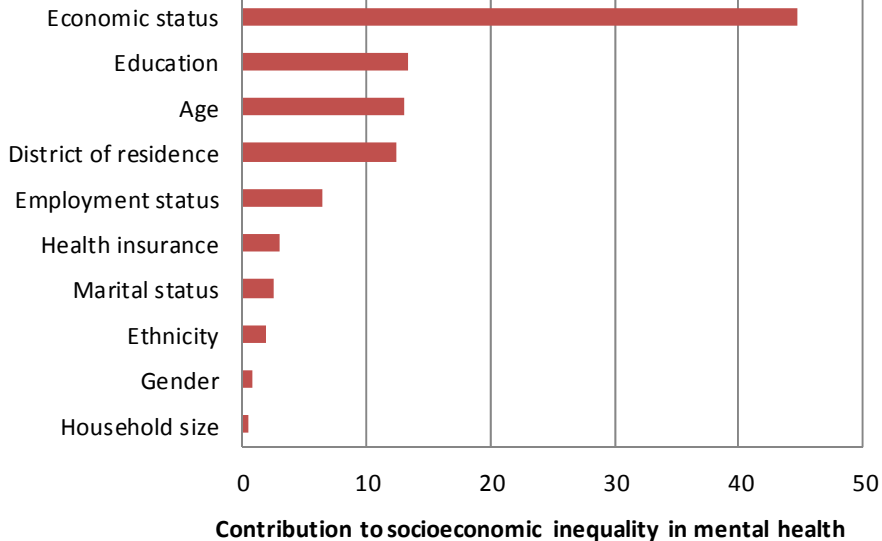

Supplement: MOESM2 [file 9550722]
